# Supplementary material
Source: Springer Nature journal article supplement (https://www.springermedizin.de/resource/supplementary/12885_2014_4631_MOESM3_ESM.pdf/9466878)

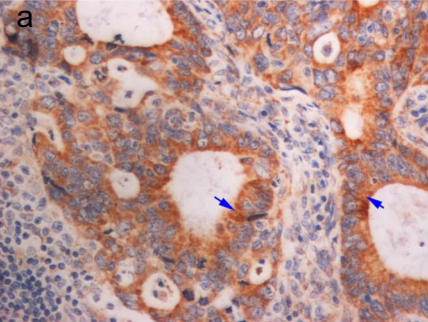

200  $\mu$ m

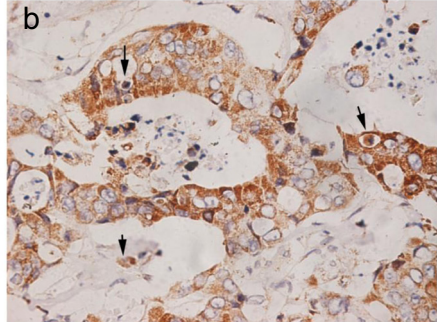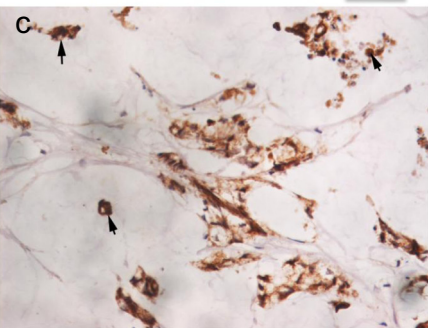

**d**

Nuclear HO-1 expression
   
 Cytoplasmic HO-1 expression

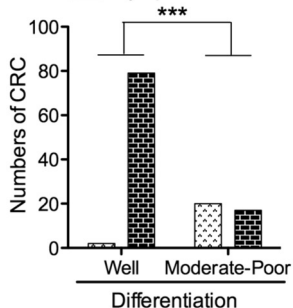

Supplement: MOESM3 [file 9466878]
